# Supplementary material for: The nuclear retinoid‐related orphan receptor ROR α controls circadian thermogenic programming in white fat depots
Source: PubMed Central journal article supplement (PMC5907938; doi:10.14814/phy2.13678), 2018-04-19

A

Body weight (grams)

Glycemia (g/l)

Insulinemia (ng/l)

HOMA-IR

New Fig S1, Monnier et al

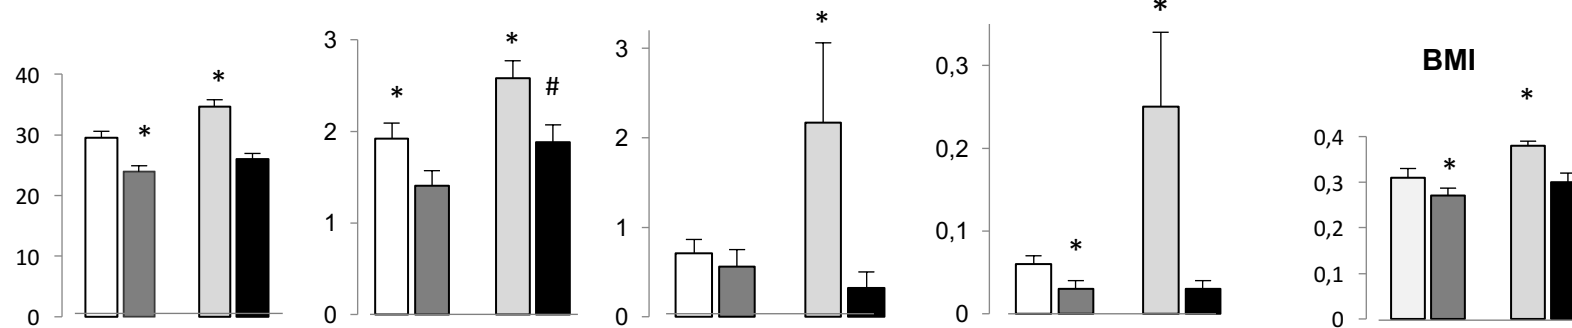

B

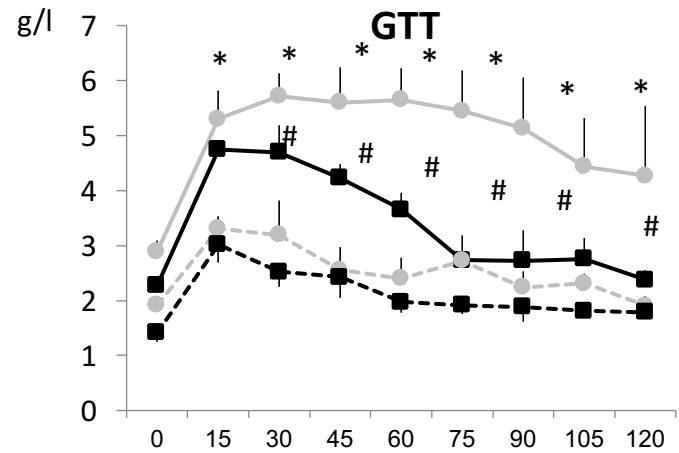

Mean AUC-GTT

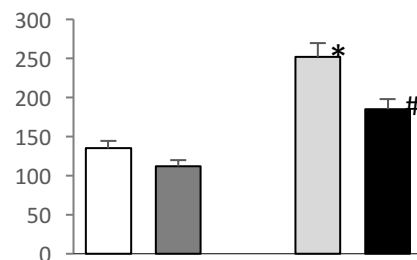

ITT

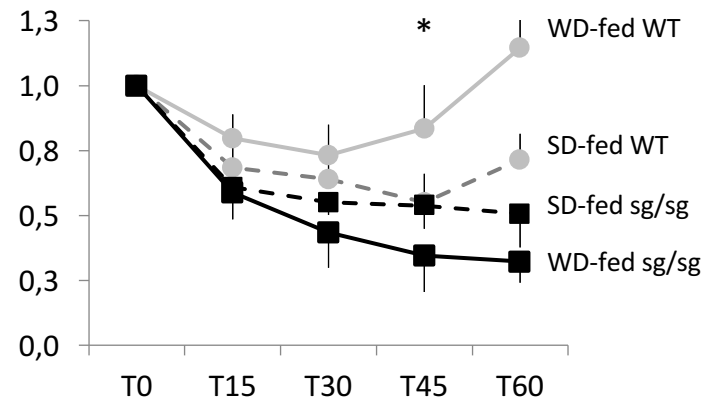

Slopes-ITT

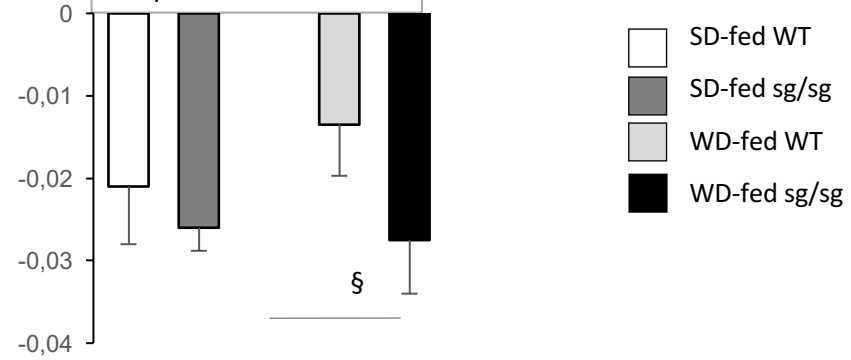

C

Daily food intake (g)

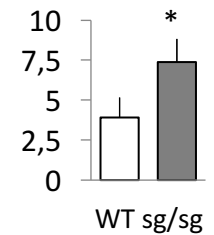

Supplement: PHY2-6-e13678-s001.pdf [file PHY2-6-e13678-s001.pdf]
