# Supplementary material for: The nuclear retinoid‐related orphan receptor ROR α controls circadian thermogenic programming in white fat depots
Source: PubMed Central journal article supplement (PMC5907938; doi:10.14814/phy2.13678), 2018-04-19

A

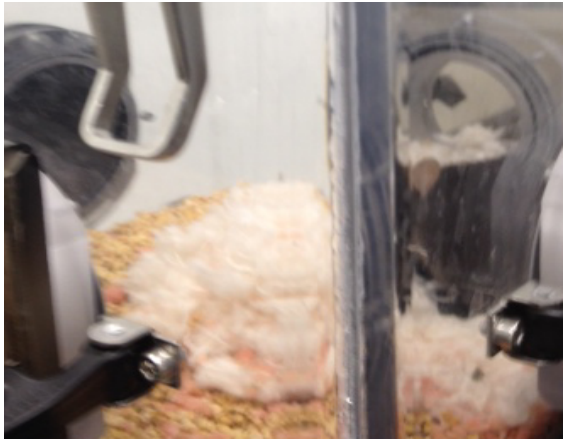

Male WT

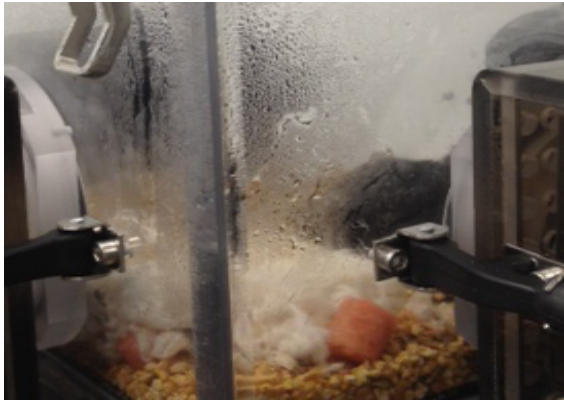

Male sg/sg

B

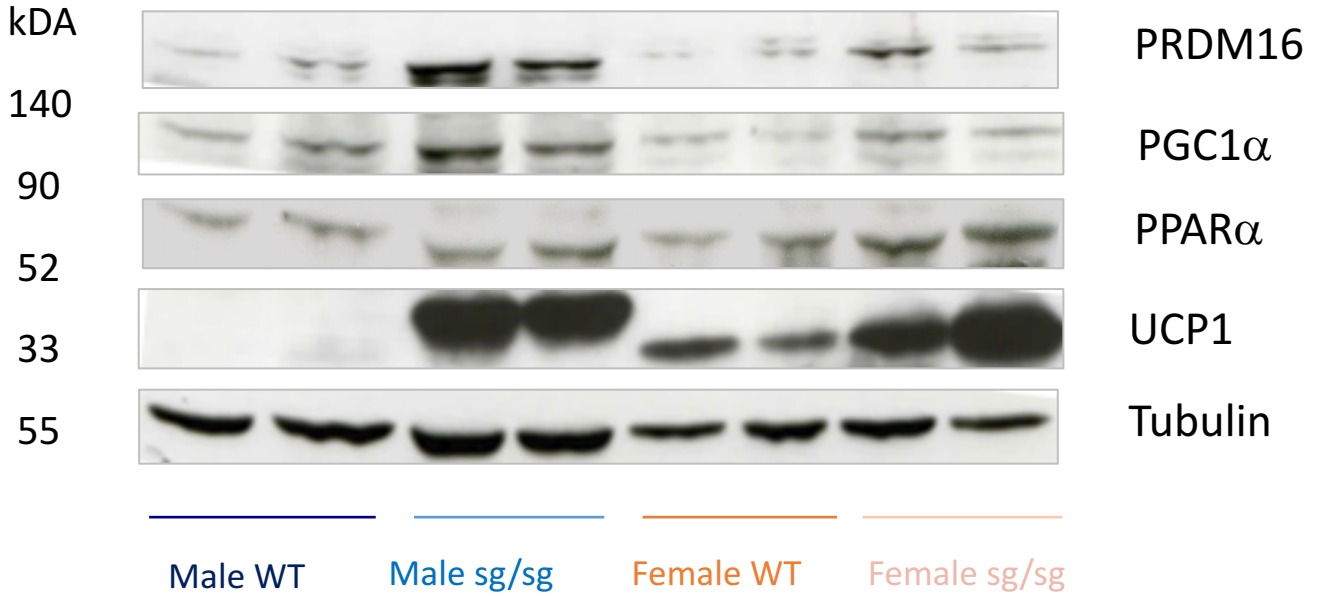

UCP1 / tubuline

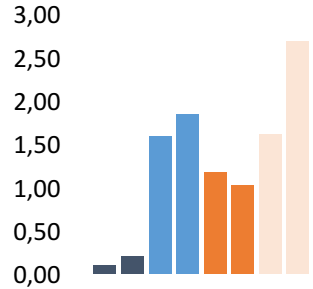

PRDM16/ tubuline

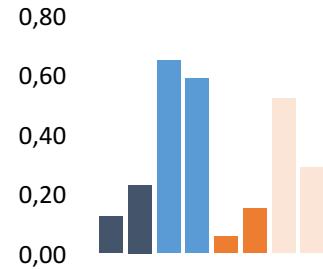

Supplement: PHY2-6-e13678-s002.pdf [file PHY2-6-e13678-s002.pdf]
