# Supplementary material for: The nuclear retinoid‐related orphan receptor ROR α controls circadian thermogenic programming in white fat depots
Source: PubMed Central journal article supplement (PMC5907938; doi:10.14814/phy2.13678), 2018-04-19

Female WT

Female sg/sg

Female WD-sg/sg

IAT

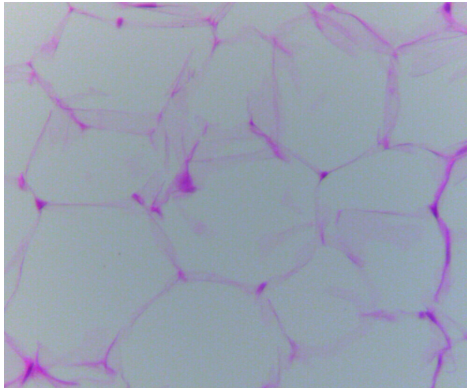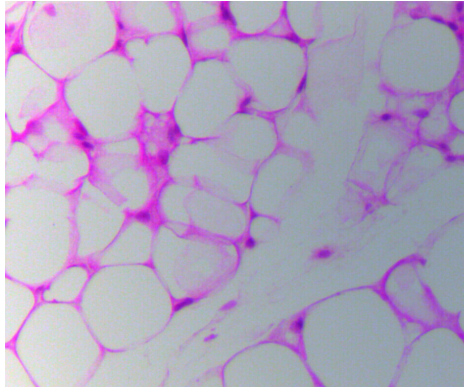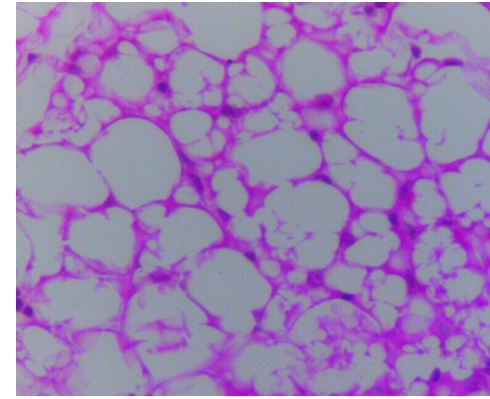

PGAT

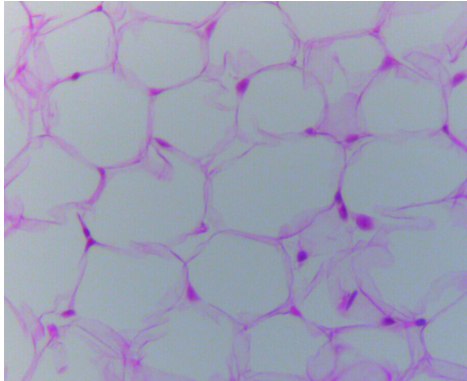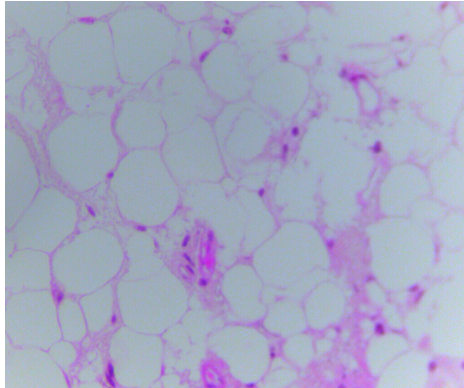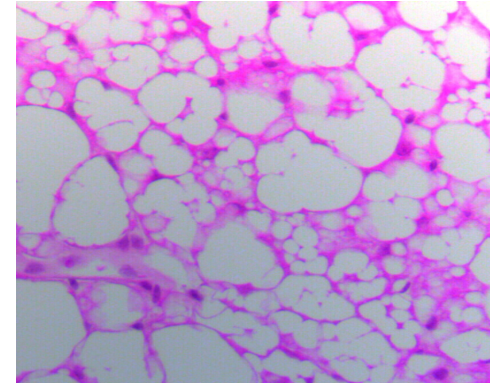

BAT

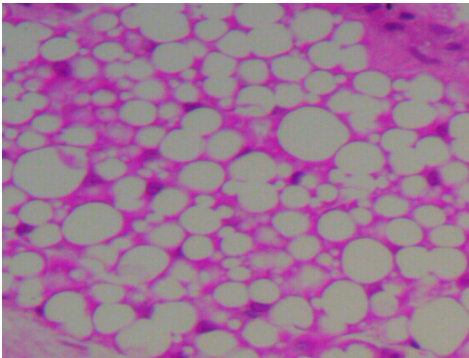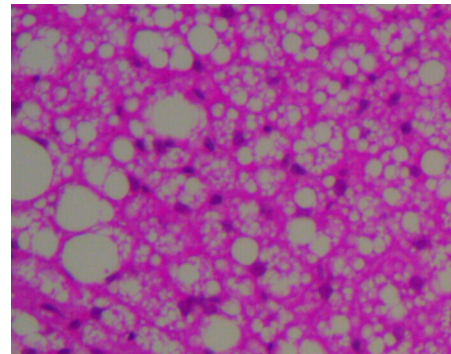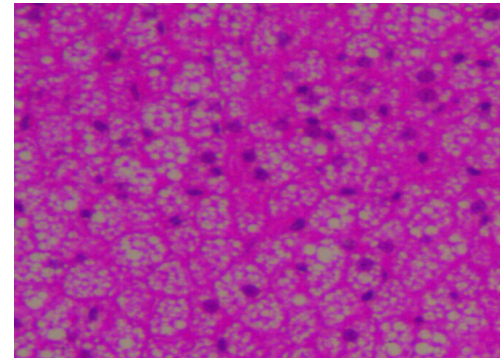

Supplement: PHY2-6-e13678-s003.pdf [file PHY2-6-e13678-s003.pdf]
